# Supplementary material for: Black-White Differences in Pregnancy Desire During the Transition to Adulthood
Source: Oxford University Press journal article supplement (doi:10.1215/00703370-8993840), 2021-02-19
Supplement: barber_esm.pdf [file barber_esm.pdf]

## Online Appendix

**Table A1** Prospective Descriptions of Desires/Plans for Future Pregnancies

| <b><i>Black (n = 25<sup>+</sup>)</i></b>                                                                                                                                                                                                                                                                                                                                                                                                                                                                                                                                                                                                                                                                                                                                                                                                                                                                                                                                                                                                                                                                                                                                                                                                                                                                                                                                                                                                                                                                                                                                                                                                                                                                                                                                                                                                                                                                                                                                                                                                                                                                                                                                                                                                                                                                                                                                                                                                                                                                                                                                                                                                                            | <b><i>White (n = 19<sup>+</sup>)</i></b>                                                                                                                                                                                                                                                                                                                                                                                                                                                                                                                                                                                                                                                                                                                                                                                                                                                                                                                                                                                                                                                                                                                                                                                                                                                                                                                                                                                                                                                                                                                                                                                                                                                                                                                                                                                                                                                                                                                                                                                                                                                                                                                                                                                                                                                                                                                                                                                                                                                                                                                                                                                                                                                                                                  |
|---------------------------------------------------------------------------------------------------------------------------------------------------------------------------------------------------------------------------------------------------------------------------------------------------------------------------------------------------------------------------------------------------------------------------------------------------------------------------------------------------------------------------------------------------------------------------------------------------------------------------------------------------------------------------------------------------------------------------------------------------------------------------------------------------------------------------------------------------------------------------------------------------------------------------------------------------------------------------------------------------------------------------------------------------------------------------------------------------------------------------------------------------------------------------------------------------------------------------------------------------------------------------------------------------------------------------------------------------------------------------------------------------------------------------------------------------------------------------------------------------------------------------------------------------------------------------------------------------------------------------------------------------------------------------------------------------------------------------------------------------------------------------------------------------------------------------------------------------------------------------------------------------------------------------------------------------------------------------------------------------------------------------------------------------------------------------------------------------------------------------------------------------------------------------------------------------------------------------------------------------------------------------------------------------------------------------------------------------------------------------------------------------------------------------------------------------------------------------------------------------------------------------------------------------------------------------------------------------------------------------------------------------------------------|-------------------------------------------------------------------------------------------------------------------------------------------------------------------------------------------------------------------------------------------------------------------------------------------------------------------------------------------------------------------------------------------------------------------------------------------------------------------------------------------------------------------------------------------------------------------------------------------------------------------------------------------------------------------------------------------------------------------------------------------------------------------------------------------------------------------------------------------------------------------------------------------------------------------------------------------------------------------------------------------------------------------------------------------------------------------------------------------------------------------------------------------------------------------------------------------------------------------------------------------------------------------------------------------------------------------------------------------------------------------------------------------------------------------------------------------------------------------------------------------------------------------------------------------------------------------------------------------------------------------------------------------------------------------------------------------------------------------------------------------------------------------------------------------------------------------------------------------------------------------------------------------------------------------------------------------------------------------------------------------------------------------------------------------------------------------------------------------------------------------------------------------------------------------------------------------------------------------------------------------------------------------------------------------------------------------------------------------------------------------------------------------------------------------------------------------------------------------------------------------------------------------------------------------------------------------------------------------------------------------------------------------------------------------------------------------------------------------------------------------|
| <p><b><i>Stopping/Long Delay</i></b></p> <ol style="list-style-type: none"> <li>1. Yeah, he (partner) wants another child. I'm not going to have any more kids any time soon. (not pregnant)</li> <li>2. If I decide to get off (injectable contraception), I'll be getting my tubes tied. Because I know I'm not having any more (children). (not pregnant)</li> <li>3. Respondent: I don't want children.<br/>Interviewer: Just right now?<br/>Respondent: I don't want children, period. (not pregnant)</li> <li>4. If I could really get my tubes tied (at upcoming delivery), I would request for them to get tied. (pregnant)</li> <li>5. After this one, I'm not going to get (back) on NuvaRing. I think I want to get the thing – is it the Mirena you put in you for five years? Yeah, I think I'm going to get that, because I don't want any more kids after this. (pregnant)</li> <li>6. After this, I'm going to get my tubes tied. (pregnant)</li> </ol> <p><b><i>Child Spacing</i></b></p> <ol style="list-style-type: none"> <li>1. I can still have some (after recently having a premature baby who died shortly after birth). But I'd rather wait. (not pregnant)</li> <li>2. We'll probably wait at least a year. That'll be the closest in time to her (recently born baby girl). (not pregnant)</li> <li>3. I told myself that when my son turns three. Two or three. Because I want them kind of close in age. (not pregnant)</li> <li>4. I think I will have about three or four. Not back-to-back, either. I won't do that. I'll wait a couple of years. Let me at least lose some weight and then try it again. (not pregnant)</li> </ol> <p><b><i>Education/Career</i></b></p> <ol style="list-style-type: none"> <li>1. Probably the next couple years. Yeah, after I get my degree. (not pregnant)</li> <li>2. If I were ever to have another kid, I'd wait until I had already gotten established and had a job. I don't want to go on maternity leave right after getting a new job. Then [child's name] would be like seven or eight. (not pregnant)</li> <li>3. I don't want any right now. No more right now. Maybe once I get my career started and he gets his started, we'll think about it. But right now, we plan on moving out of state.... So it wouldn't be good right now. (not pregnant)</li> </ol> <p><b><i>Material Conditions</i></b></p> <ol style="list-style-type: none"> <li>1. Well, I don't go out to clubs, so probably 22? I would probably still work and go to school, too. I just want my own place. (...) When you don't have your own place and stuff like that, why have a baby, you know?</li> </ol> | <p><b><i>Stopping/Long Delay</i></b></p> <ol style="list-style-type: none"> <li>1. I'm hoping it's a girl. If it's not, we're still not going to try for another one. I'm going to talk to my doctor about giving me a total hysterectomy. (pregnant)</li> <li>2. I wanted about four, but I might be done after this one. Because of the hard pregnancies, you know. I don't want to have another, like if I lose (miscarry) one. (pregnant)</li> <li>3. After I have this baby, I am going to get my tubes tied. I'm not going to have any more kids. I think a boy and a girl is enough for me, especially from where I'm at right now. (pregnant)</li> <li>4. We already talked about it. We're not having another abortion if we get pregnant again. After this pregnancy, I want to get on that thing that they put in your arm, that little piece of plastic that they inject into – I think it's called the Implanon or something like that. (pregnant)</li> </ol> <p><b><i>Child Spacing</i></b></p> <ol style="list-style-type: none"> <li>1. He (husband) has a family plan in his head that when our son is two years old, he wants to have our second child. And I told him I will only have two kids and that's it. I won't have any more kids after two. He's okay with that. He would rather have three, but he's not getting three, so if he wants...<br/>Interviewer: How do you feel about having another child in two years?<br/>Respondent: I think that it's good. (pregnant)</li> <li>2. I'll probably wait a little while (after current pregnancy). I don't know. Like, three, two years apart. (pregnant)</li> <li>3. I'm not trying to have them back-to-back, I want space (between children). (pregnant)</li> </ol> <p><b><i>Education/Career</i></b></p> <ol style="list-style-type: none"> <li>1. I plan on having kids one day, but not in the near future. I'd rather get done with school and everything first. (not pregnant)</li> <li>2. Respondent: I don't want to have a baby.<br/>Interviewer: Ever? Or at this point in your life?<br/>Respondent: At this point in my life really I don't.<br/>Interviewer: Why not?<br/>Respondent: I want to go to school for cosmetology. (not pregnant)</li> <li>3. I'm actually looking into school right now and they said they could probably get me in (soon). I want to start a career, get some stability in my life before I even think about having kids or anything like that. The minimum age I would like to actually have a kid is 25. If I go later that's fine. (not pregnant)</li> </ol> <p><b><i>Material Conditions</i></b></p> <ol style="list-style-type: none"> <li>1. We've talked about it and we just feel like right now</li> </ol> |

|                                                                                                                                                                                                                                                                                                                                                                                                                                                                                                                                                                                                                                                                                                                                                                                                                                                                                                                                                                                                                                                                                                                                                                                                                                                                                                                                                                                                                                                                                                                                                                                                                                                                                                                                                                                                                                                                                                                                                                                                                                                                                                                                                                                                                                                                                                        |                                                                                                                                                                                                                                                                                                                                                                                                                                                                                                                                                                                                                                                                                                                                                                                                                                                                                                                                                                                                                                                                                                                                                                                                                                                                                                                                                                                                                                                                                                                                                                                                                                                                                                                                                                                                                                                                                                                                                                                                                                   |
|--------------------------------------------------------------------------------------------------------------------------------------------------------------------------------------------------------------------------------------------------------------------------------------------------------------------------------------------------------------------------------------------------------------------------------------------------------------------------------------------------------------------------------------------------------------------------------------------------------------------------------------------------------------------------------------------------------------------------------------------------------------------------------------------------------------------------------------------------------------------------------------------------------------------------------------------------------------------------------------------------------------------------------------------------------------------------------------------------------------------------------------------------------------------------------------------------------------------------------------------------------------------------------------------------------------------------------------------------------------------------------------------------------------------------------------------------------------------------------------------------------------------------------------------------------------------------------------------------------------------------------------------------------------------------------------------------------------------------------------------------------------------------------------------------------------------------------------------------------------------------------------------------------------------------------------------------------------------------------------------------------------------------------------------------------------------------------------------------------------------------------------------------------------------------------------------------------------------------------------------------------------------------------------------------------|-----------------------------------------------------------------------------------------------------------------------------------------------------------------------------------------------------------------------------------------------------------------------------------------------------------------------------------------------------------------------------------------------------------------------------------------------------------------------------------------------------------------------------------------------------------------------------------------------------------------------------------------------------------------------------------------------------------------------------------------------------------------------------------------------------------------------------------------------------------------------------------------------------------------------------------------------------------------------------------------------------------------------------------------------------------------------------------------------------------------------------------------------------------------------------------------------------------------------------------------------------------------------------------------------------------------------------------------------------------------------------------------------------------------------------------------------------------------------------------------------------------------------------------------------------------------------------------------------------------------------------------------------------------------------------------------------------------------------------------------------------------------------------------------------------------------------------------------------------------------------------------------------------------------------------------------------------------------------------------------------------------------------------------|
| <p>Where is it going to be? There's only two rooms here, and I'm barely here, so where is the baby going to sleep? (not pregnant)</p> <ol style="list-style-type: none"> <li>I'd say about 20-... 27, 28 would be a nice age. And it is a lot about money. If I was 27 and I had the same job and the same predicament I'm in right now, I still wouldn't be ready to have kids. (not pregnant)</li> <li>I just think if it was timed better their lives would have been different (cousins' pregnancies). And I don't want to be like that. I don't want to penny pinch. I want to be comfortable. I want to be in a position to get my kids whatever they want. (not pregnant)</li> </ol> <p><b>Relationship Conditions</b></p> <ol style="list-style-type: none"> <li>I guess whenever I get married. So, I don't know.... 26. (not pregnant)</li> <li>I definitely want to have two to three kids. I was an only child, so I don't want to have just one because I know how that feels. But I definitely want to be married first and actually be settled down, know I'm financially set, before I start a family. (not pregnant)</li> <li>I probably would want to feel the feeling of having a kid, so I will probably have sex with a man that I trust, make sure everything is good and right between both of us before anything happens. (not pregnant)</li> <li>Interviewer: Would you be happy (about a pregnancy)?<br/>Respondent: Yeah, I'd be happy. If it was with him (current boyfriend). But anybody else, no. I would get an abortion quick. (not pregnant)</li> </ol> <p><b>Age Range/Other</b></p> <ol style="list-style-type: none"> <li>Let's see, I'm 23 now, so in about... about 26 or so. (not pregnant)</li> <li>I'm 23 now, so I'm hoping that by around 25, 26, I'll have one by then. (not pregnant)</li> <li>I would say 25. Because it's not like you're still young. But you're not extremely old. (not pregnant)</li> </ol> <p><b>Proception</b></p> <ol style="list-style-type: none"> <li>Now (currently trying to become pregnant with husband). (not pregnant)</li> </ol> <p><b>Not Planning</b></p> <ol style="list-style-type: none"> <li>I mean, if it happens, it happens, what can you do? But I'm not trying to make it happen. (not pregnant)</li> </ol> | <p>is not the best time financially to have a kid. (not pregnant)</p> <p><b>Relationship Conditions</b></p> <ol style="list-style-type: none"> <li>Interviewer: What are some of the things that are important for you to do to not "be a statistic?"<br/>Respondent: Not have another baby. I don't want to be a young mom with a million kids. Next time do it the right way, get married, have a child. (not pregnant)</li> <li>Well, clearly we don't want to get pregnant yet, you know. We want to wait until (upcoming wedding) before we plan for another kid. (not pregnant)</li> </ol> <p><b>Age Range/Other</b></p> <ol style="list-style-type: none"> <li>I love being a mom. I'd like more, but right now it's probably not the best. (not pregnant)</li> <li>I'm just not ready for motherhood yet. I do want kids eventually, but I want to wait until I'm ready to have a kid before I have one. And as long as I can help it that's the way I want it to go. (not pregnant)</li> <li>Interviewer: Are you going to go back on birth control (oral contraceptives), or are you going to start using condoms after this baby?<br/>Respondent: Totally, yeah. Probably both. (pregnant)</li> <li>Now, being older and smarter, I don't have sex at all without condoms and birth control -- it's just my way of completely avoiding it (pregnancy and making a decision about an abortion). (not pregnant)</li> </ol> <p><b>Proception</b></p> <p>--</p> <p><b>Not Planning</b></p> <ol style="list-style-type: none"> <li>I would say maybe twenties....late 20s. I mean, I don't want to put a time on it, because when it's bound to happen.... When it's your season, it's going to happen. I mean, whenever God has that person for me, and me and the guy get married. But nothing right now, nothing in the next couple years. (not pregnant)</li> <li>I don't want more kids right now. But if it were to happen, I would roll with the punches like I did with (existing child). (not pregnant)</li> </ol> |
|--------------------------------------------------------------------------------------------------------------------------------------------------------------------------------------------------------------------------------------------------------------------------------------------------------------------------------------------------------------------------------------------------------------------------------------------------------------------------------------------------------------------------------------------------------------------------------------------------------------------------------------------------------------------------------------------------------------------------------------------------------------------------------------------------------------------------------------------------------------------------------------------------------------------------------------------------------------------------------------------------------------------------------------------------------------------------------------------------------------------------------------------------------------------------------------------------------------------------------------------------------------------------------------------------------------------------------------------------------------------------------------------------------------------------------------------------------------------------------------------------------------------------------------------------------------------------------------------------------------------------------------------------------------------------------------------------------------------------------------------------------------------------------------------------------------------------------------------------------------------------------------------------------------------------------------------------------------------------------------------------------------------------------------------------------------------------------------------------------------------------------------------------------------------------------------------------------------------------------------------------------------------------------------------------------|-----------------------------------------------------------------------------------------------------------------------------------------------------------------------------------------------------------------------------------------------------------------------------------------------------------------------------------------------------------------------------------------------------------------------------------------------------------------------------------------------------------------------------------------------------------------------------------------------------------------------------------------------------------------------------------------------------------------------------------------------------------------------------------------------------------------------------------------------------------------------------------------------------------------------------------------------------------------------------------------------------------------------------------------------------------------------------------------------------------------------------------------------------------------------------------------------------------------------------------------------------------------------------------------------------------------------------------------------------------------------------------------------------------------------------------------------------------------------------------------------------------------------------------------------------------------------------------------------------------------------------------------------------------------------------------------------------------------------------------------------------------------------------------------------------------------------------------------------------------------------------------------------------------------------------------------------------------------------------------------------------------------------------------|

† Three Black respondents and four white respondents described retrospective desires/plans as well as prospective desires/plans. They are included in both Appendix Table 1 and Appendix Table 2.

**Appendix Table 2** Retrospective Descriptions of Pre-Conception Desires/Plans for Prior Pregnancies

| <b><i>Black (n = 10<sup>+</sup>)</i></b>                                                                                                                                                                                                                                                                                                                                                                                                                                                                                                                                                                                                                                                                                                                                                                                                                                                                                                                                                                                                                                                                                                                                                                                                                                                                                                                                                                                                                                                                                                                                                                                                                                                                                                                                                                                                                                                                                                                                                                                                                                                                                                                                                                                                                                                                                                                                                  | <b><i>White (n = 13<sup>+</sup>)</i></b>                                                                                                                                                                                                                                                                                                                                                                                                                                                                                                                                                                                                                                                                                                                                                                                                                                                                                                                                                                                                                                                                                                                                                                                                                                                                                                                                                                                                                                                                                                                                                                                                                                                                                                                                                                                                                                                                                                                                                                                                                                                                                                                                                                                |
|-------------------------------------------------------------------------------------------------------------------------------------------------------------------------------------------------------------------------------------------------------------------------------------------------------------------------------------------------------------------------------------------------------------------------------------------------------------------------------------------------------------------------------------------------------------------------------------------------------------------------------------------------------------------------------------------------------------------------------------------------------------------------------------------------------------------------------------------------------------------------------------------------------------------------------------------------------------------------------------------------------------------------------------------------------------------------------------------------------------------------------------------------------------------------------------------------------------------------------------------------------------------------------------------------------------------------------------------------------------------------------------------------------------------------------------------------------------------------------------------------------------------------------------------------------------------------------------------------------------------------------------------------------------------------------------------------------------------------------------------------------------------------------------------------------------------------------------------------------------------------------------------------------------------------------------------------------------------------------------------------------------------------------------------------------------------------------------------------------------------------------------------------------------------------------------------------------------------------------------------------------------------------------------------------------------------------------------------------------------------------------------------|-------------------------------------------------------------------------------------------------------------------------------------------------------------------------------------------------------------------------------------------------------------------------------------------------------------------------------------------------------------------------------------------------------------------------------------------------------------------------------------------------------------------------------------------------------------------------------------------------------------------------------------------------------------------------------------------------------------------------------------------------------------------------------------------------------------------------------------------------------------------------------------------------------------------------------------------------------------------------------------------------------------------------------------------------------------------------------------------------------------------------------------------------------------------------------------------------------------------------------------------------------------------------------------------------------------------------------------------------------------------------------------------------------------------------------------------------------------------------------------------------------------------------------------------------------------------------------------------------------------------------------------------------------------------------------------------------------------------------------------------------------------------------------------------------------------------------------------------------------------------------------------------------------------------------------------------------------------------------------------------------------------------------------------------------------------------------------------------------------------------------------------------------------------------------------------------------------------------------|
| <p><b><i>Child Spacing</i></b><br/>--</p> <p><b><i>Education/Career or Material Conditions</i></b><br/>1. Interviewer: Before that (pregnancy that led to twins), did you have an idea about what the perfect age might be for you?<br/>Respondent: My perfect age was when I was finished with school..... about 25. (not pregnant)<br/>2. But I was still trying to finish high school. Even though I was having unprotected sex, I didn't want a baby then. So, at least I waited until after I graduated, had my own place, my own car. I was working. (not pregnant)‡</p> <p><b><i>Relationship Conditions</i></b><br/>1. I wanted to be married. I always had this big dream, you know? Getting married..... and I always pictured my house and how I wanted it to be, and everything. (pregnant)</p> <p><b><i>Age Range/Other</i></b><br/>1. I didn't want to get pregnant. I don't know, I didn't really want to get pregnant, not now. I wanted to wait until I was like at least 25 or something. (pregnant)</p> <p><b><i>Proception</i></b><br/>1. To be honest, nothing (type of contraception). Because I wanted to get pregnant by him because he's nice. He's respectful. And when it comes to his granny or me, he's crazy about us. (not pregnant)</p> <hr/> <p><b><i>Not Planning</i></b><br/>1. Interviewer: When he would tell you that he could see you as the mother of his child, do you think he meant in the future? Or then?<br/>Respondent: Whenever it happened. (not pregnant)‡<br/>2. Um... no I wasn't on the pill, I don't know why I wasn't on it, couldn't even tell you. I think condoms were hit or miss, so definitely not making smart choices during that time. (not pregnant)<br/>3. No, we weren't trying, but we weren't not trying. (not pregnant)<br/>4. It (recent miscarriage) was... confusing. I just figured, God didn't, it wasn't time for me yet, to have one. (not pregnant)<br/>5. (After discussion about telling partner's mother about the pregnancy.) She said, "That's on y'all. Y'all grown." She was like, "If it's going to happen...."<br/>Interviewer: Is that right? It's going to happen?<br/>Respondent: I didn't really want kids until I got out of school. But it happened, so I guess so. (pregnant)<br/>6. He (God) wrote my life. He knew what was going to happen before I did, so there was no way I could</p> | <p><b><i>Child Spacing</i></b><br/>1. I wanted him (existing child) to have a younger brother and I didn't want a big age difference. (pregnant)</p> <p><b><i>Education/Career</i></b><br/>--</p> <p><b><i>Material Conditions</i></b><br/>--</p> <p><b><i>Relationship Conditions</i></b><br/>1. He kind of asked me, "Can you have a baby?" Of course, I'm like, "No. I'm not married." I was already condoning sex before marriage and everything. So I was like "No, I don't want to do it, I won't do it, you can't make me do it, there's nothing you can say that will influence me." (not pregnant)</p> <p><b><i>Age Range/Other</i></b><br/>1. It's not, it was never in my plan. I've had my whole life planned out -- this is what I want, this is where I want to be.... (pregnant)<br/>2. Interviewer: Surprise? (referring to current pregnancy) Respondent: Yeah. I mean, didn't think I... they said after my son passed away that I might not be able to have kids anymore. (pregnant)</p> <p><b><i>Proception</i></b><br/>1. There were a few times when I ovulated when we tried (to get pregnant) and we didn't (get pregnant). But for the most part, I really didn't get to where I knew what was going on, when I was ovulating, when I was going to start (menstruating). I didn't get all of that under control until pretty close to the end of the relationship. (not pregnant)<br/>2. Interviewer: So, were you trying to get pregnant when you had this one?<br/>Respondent: We were, yes, but we told everybody we weren't. (not pregnant)</p> <hr/> <p><b><i>Not Planning</i></b><br/>1. I didn't find them (condoms) very important. I knew what could happen but I didn't (use them consistently). I used them sometimes. With one of my boyfriends, we pretty much used one almost every time. That was his call. I didn't care either way. (not pregnant)<br/>2. I honestly wanted to be able to start school and stuff before I had the baby. But I think that there's never a good time for a baby to come anyway, so.... (pregnant)<br/>3. And I used to always pray to God. I'd say, "God, please, I don't want to be pregnant. Please don't let me be pregnant." (pregnant)</p> |

|                                                                                                                                                                                                                                                                                                                                            |                                                                                                                                                                                                                                                                                                                                                                                                                                                                                                                                                                                                                                       |
|--------------------------------------------------------------------------------------------------------------------------------------------------------------------------------------------------------------------------------------------------------------------------------------------------------------------------------------------|---------------------------------------------------------------------------------------------------------------------------------------------------------------------------------------------------------------------------------------------------------------------------------------------------------------------------------------------------------------------------------------------------------------------------------------------------------------------------------------------------------------------------------------------------------------------------------------------------------------------------------------|
| <p>have gotten rid of it (gotten an abortion). Like I tried to explain to my grandma, "You're Christian. You know." I felt like there's no way I could have hidden from this. I wish he would have waited a little while longer, but I felt like I couldn't escape it. It's like my mom; she got pregnant on birth control. (pregnant)</p> | <ol style="list-style-type: none"> <li>4. Yeah, it wasn't planned, yeah, this probably isn't the best time of our life for this to be happening. But, you know everything happens for a reason and what's done is done. (pregnant)</li> <li>5. Stuff happened and we were kind of careless and I ended up pregnant. (pregnant)</li> <li>6. I just, I guess, didn't think about it. I mean, if I had a baby with him, I had a baby with him. (pregnant)</li> <li>7. It wasn't really trying. But, I don't know, I mean, he's always loved kids and stuff. So we weren't really trying... it just kinda happened. (pregnant)</li> </ol> |
|--------------------------------------------------------------------------------------------------------------------------------------------------------------------------------------------------------------------------------------------------------------------------------------------------------------------------------------------|---------------------------------------------------------------------------------------------------------------------------------------------------------------------------------------------------------------------------------------------------------------------------------------------------------------------------------------------------------------------------------------------------------------------------------------------------------------------------------------------------------------------------------------------------------------------------------------------------------------------------------------|

‡ Same respondent.

† Three Black respondents and four white respondents described retrospective desires/plans as well as prospective desires/plans. They are included in both Appendix Table 1 and Appendix Table 2.
